# Supplementary material for: Comorbidity genes of Alzheimer’s disease and type 2 diabetes associated with memory and cognitive function
Source: Preprints.org preprint supplement (doi:10.20944/preprints202312.1756.v1), 2023-12-22
Supplement: Supplementary file 2 [file supplementary]

Archive with 7 entries (7 files):
- Supplementary Materials/Cover letter.pdf
- Supplementary Materials/Supplementary Methods.docx
- Supplementary Materials/Table S1.xlsx
- Supplementary Materials/Table S2.xlsx
- Supplementary Materials/Table S3.xlsx
- Supplementary Materials/Table S4.xlsx
- Supplementary Materials/Table S5.xlsx
