# Supplementary material for: Comorbidity genes of Alzheimer’s disease and type 2 diabetes associated with memory and cognitive function
Source: Preprints.org preprint supplement (doi:10.20944/preprints202312.1756.v1), 2023-12-22
Supplement: Supplementary file 2 [file supplementary › Supplementary Materials/Cover letter.pdf]

Dear Dr. Michael Welsh

I wish to submit my original research article entitled " Comorbidity genes of Alzheimer's disease and type 2 diabetes associated with memory and cognitive function" to International Journal of Molecular Sciences. In this research, common genes of Alzheimer's disease and type 2 diabetes were analyzed using network-based clustering and genes of clusters with high clustering coefficients were intensively reviewed. Moreover, memory and cognition-associated genes were also considered and analyzed to provide valuable information about tentative targets for management of Alzheimer's disease or type 2 diabetes. I believe the results are well suited to the readership of Internal journal of Molecular Sciences.

I confirm that neither the manuscript nor any parts of its content are currently under consideration or published in another journal.

2023 12-21

Sincerely yours,

Seong Beom Cho, M.D., Ph.D.
