# Supplementary material for: Comorbidity genes of Alzheimer’s disease and type 2 diabetes associated with memory and cognitive function
Source: Preprints.org preprint supplement (doi:10.20944/preprints202312.1756.v1), 2023-12-22
Supplement: Supplementary file 2 [file supplementary › Supplementary Materials/Table S1.xlsx]

## Sheet: AD & T2DM genes
CHI3L1
MEFV
EPC2
APOE
MIR146A
ACTB
SRL
LAMC2
MIR206
COMT
GLB1
APP
SUCLA2
NFE2L2
PGF
IL6
GFAP
CD2AP
BCHE
UCHL1
ACHE
MAPT
HSPD1
NECTIN2
KEAP1
CUX1
BACE1
LDLR
MIR29A
SORL1
MTOR
SIGMAR1
CDH2
LCN2
IGF2
IL13
PRKAA1
SERPINB6
MIR125A
SMAD2
CLOCK
PIK3CB
PSEN1
LPL
FLNA
POLDIP2
PPARG
HCRT
MCIDAS
HMOX1
RNR2
PPIA
DNM1L
CSF2
SIGLEC7
SNCA
CD68
ALDH2
C4B
MTHFR
PTPA
COX8A
SAA1
BDNF
CXCL12
CD33
TSHZ1
PLEK
TLR4
IL18
VDAC1
SPP1
CTSD
ADIPOQ
RPS6KB1
TREM2
FAS
GLP1R
CYP3A4
AGT
NR3C1
CAV1
TOMM40
SGCG
NRXN3
TNFRSF1B
MTCO2P12
CAMK2A
MIR155
APOA1
BRAP
SORCS1
NDUFAF6
GTF2H1
EPHB2
UTRN
BMS1
CTNNB1
CRP
PINK1
CLU
CNR2
ALOX5
ZNF236
IL1B
CASP1
OR2AG1
ITGAX
FZD4
GPR151
TRIB3
ABCB1
P2RX4
LEP
AIF1
PAEP
MAPK14
FGF1
CASP3
TNFSF10
MRGPRX1
BECN1
CREB1
AIM2
SMUG1
POTEM
SLC1A2
HSPA4
POTEKP
ABCG1
SERPINA3
MEF2C
DPP4
PWAR4
HDAC4
PDIK1L
METAP2
IMPA1
PRDX2
KHSRP
FCGR3B
GPX1
VEGFA
GRN
BCL2A1
VN1R17P
EHMT1
CAT
ESR1
NR1I2
LBP
SQSTM1
ADCYAP1
LGALS3
APRT
IL4
PRKCB
CD40LG
INSR
NEFL
MSC
BCL2
CBSL
SOD2
GPER1
FANCD2
ANPEP
CHRNA4
ACE
PIK3CD
UGT1A
TTR
HK1
IFNA13
NR1H2
SIRT1
PTGS2
CYP46A1
MIR107
IL6R
PTF1A
NANS
RNF19A
KLK3
IGFALS
LGR6
PFKFB3
NGF
MIR200A
CRTC1
PON2
XBP1
GPRC5B
ANGPT2
TNF
PPARA
FKBP4
ITGB2
TP53
S100A9
LIPC
GSK3B
ATXN1
GAD1
TGFB1
BRD4
CRK
NTRK2
MIR34A
VIM
HHEX
IFNG
BRCA2
IL2
COX2
CP
POMC
SERPINA1
NPC1
HGS
CX3CR1
YY1
PLIN2
ADRB2
HNRNPA1
DISC1
NRG1
MOK
HTR2A
IL16
SCD
ILK
AGER
SIRT3
EPO
MIR27A
MSH2
GAP43
CST3
XRCC1
STAT3
C4B_2
SOD1
REM1
GDF2
PCK1
MAPK8
CRMP1
IAPP
VPS35
MME
NTRK1
AIMP2
CAPN1
AHSA1
GRAP2
GPT
ADAM17
OLR1
APOD
HSPB2
MIR34C
TSPO
APOC2
MAPK1
IL1A
COL18A1
P4HB
NOS2
ABCA1
GCG
ITGAM
OPA1
EGR1
IDE
PDE5A
GCA
CASR
NOG
PLK1
CYP17A1
MIRLET7D
KNG1
TXN
CBLIF
NCOA6
NQO1
HLA-DQB1
PTPN11
NLGN1
GDNF
DCTN4
PIK3CG
MPO
SREBF2
LIN28A
AGTR1
PIK3CA
ELN
NGFR
NPC1L1
PICALM
CDK5
ERG
RGCC
ADARB1
HSD17B13
CYP1A2
AKT1
ATXN2
CETP
SLC6A4
CDKN2B-AS1
LSR
MMP9
CCL2
SOX5
ARNTL2
MALAT1
SOAT1
SLC30A10
SORT1
CNR1
TH
HSP90AA1
CFH
E2F1
ALOX5AP
INS-IGF2
NFATC2
DKK1
SCGN
MAOA
TYK2
LAMP2
SEMA6A
SERPINE1
CD81
MRGPRX3
DBH
CYP19A1
PCNA
MIR200B
APOB
VIP
HP
C3
GPRC6A
PIN1
CNTF
PSMB6
RCBTB1
CFB
APCS
LPA
IL1RN
VPS51
FASLG
ACTBL2
TLR2
OCA2
HPSE
ABCA4
KLF4
ENO2
KCNQ1
AKT2
LOC102723407
IL10
POU5F1
GPR42
CES1
MIR98
CALCA
IL33
FCGR3A
SERPING1
IL17A
MMP14
ALB
ZGLP1
CX3CL1
F2
PER2
CD14
IGF1
RELN
PML
REG3A
F3
BMP4
CD36
BAX
ATP5F1B
CCL3
TNFSF11
RENBP
TF
HDAC9
GPI
AKR1A1
NOL3
GSTM1
EPHA4
MACF1
HTR4
IGF1R
HMGA1
MAGEC3
CDKN2A
BIN1
ABCB6
POU5F1P4
LYZ
ELK3
LPAR3
F2RL3
CIB1
MTNR1A
CDKN1B
WASF3
HSD11B1
TIMP2
ANKK1
DYRK1A
HSD17B10
CBS
APOC3
ADRA1A
BNIP3
ALOX12
NOS3
CRHR1
ATG5
HSPG2
SOCS1
ADAMTS2
TGM2
BRCA1
P2RY1
DNMT1
AR
VLDLR
PRKAB1
CDKN1A
ACOT7
ESR2
GJA1
BMI1
NFKB1
FTO
CEBPB
GABPA
TFRC
CCR5
CXCL8
GAL
CASP8
IRS2
DCN
HMGCR
PDLIM3
TFEB
STIM1
PDE4D
PON1
LRP1
KALRN
MFN2
DENR
GLIS3
PRKAA2
YBX1
FGFR4
NTN1
IL5
TRH
SLC40A1
NLRP3
BACE2
CDC42
SBNO2
KMT2A
TAC1
BSG
MIR181C
REN
VCAM1
SSTR4
NM
ADRA2B
PCSK9
ECE1
SLC30A1
S100A6
LIPA
GSTK1
CD59
ARRB2
MAPK3
GRK2
LINC01672
MAPK7
MIR132
OXER1
TTN
CRYZ
TRAM1
PAWR
PLEKHG5
ICAM1
MLKL
GAPDH
ITM2B
MMP1
HSPA9
ELAVL2
GIP
FGF2
SST
CAPN2
SYT1
COX3
TFAM
RAC1
APOA5
ACTG2
IFNA1
PECAM1
PTK2B
MIR375
AMD1P2
RBM45
RREB1
GGT2
DBI
MIR140
CHGA
KHDRBS1
CHM
IL12A
TIMP3
PTEN
WNK1
PRRT2
DCX
NR1I3
IGFBP1
C20orf181
TCIRG1
SRSF5
PAK1
LAMA1
ACKR3
GH1
FAAH
SOX2
NOS1
CTRL
TXNIP
RAB4A
PTPN5
EDN1
HSPA1B
SNAP25
GPR166P
MGAM
SLC6A2
WNT3A
POU5F1P3
DECR1
MIR222
FOLH1
GLUL
LRP2
VDR
MIR29C
NDUFA12
REG1A
ADAM19
IRAK4
HLA-DRB1
GLS
LPAL2
EDNRA
ESRRA
ROCK1
EIF4EBP1
CYTB
RRAS
S100B
CAMK1D
CCL11
CD226
HTC2
OAS3
PYCARD
CS
MAP1LC3A
SLCO6A1
FABP3
AVPR2
HSPA1A
HSPA5
FOXO3
CAD
ATF7IP
ADM
CYP2B6
IGFBP2
NAT2
KL
GPBAR1
ALAS1
OGA
FLT1
PPARGC1A
APLN
C4A
ACTG1
WWOX
STUB1
CALCR
FABP6
MIR122
AMD1
SLC22A2
CCR2
CYP2D6
SLC2A1
FAT1
LTF
PRDX1
INSIG1
P2RX1
PVALB
LRP1-AS
SLC18A2
HDAC3
MIR1908
OGG1
LMNA
CBLL2
ANKRD55
ANK1
HSPB1
DES
BLVRA
MOG
SPHK1
PRKCA
ARID4B
ST3GAL4
MMP3
ELANE
MIF
MIR377
RCAN1
VSNL1
CTF1
P2RX7
PRKCE
GC
HTR2C
ATRNL1
ATP7A
F2RL1
SLPI
ALOX15
HAMP
MARK4
TRPM2
MMP2
PPP1R1B
FOLH1B
EIF2AK2
PGR
XPR1
AHSG
NEUROD1
ARR3
SP6
TRIM13
ADAMTS13
MRGPRX4
HEBP1
PLA2G7
SBNO1
USF1
TNMD
DLL1
BMP6
MAPK8IP1
EGF
HFE
HMGB1
ACE2
OGT
ANXA1
LOX
IKBKB
MIR142
L1CAM
DUSP6
APOM
PHB
GAS6
PSMD9
TYROBP
COL3A1
ABCC2
SMPD1
TSPAN3
CD44
SLC29A4
MIR223
OPRM1
EIF2AK3
PLA2G1B
HNP1
PGR-AS1
MIR485
KDR
GRK5
FOXM1
TRPC6
KCNC4
GSR
MIR214
EGFR
PLXNA2
NPY
RXRA
MRC1
GZMB
MEF2A
PTPRC
GSTP1
SETD7
TNFRSF1A
TRPV1
P2RX2
HPGDS
DAPK2
KAT8
HLA-DRA
FLOT1
NR4A3
ND4
PPARD
TRNL1
GDF15
SRR
PLA2G6
GSN
SELENOP
CFAP97
LINC00271
CARTPT
ANXA6
PDC
MIR26B
PARP1
LAMP1
FNDC5
MTHFD1
PRKCD
TPM1
S100A8
PLG
TBK1
STAR
HRC
MED23
SIRT5
PLAT
FOLR2
INS
CGB8
NR4A2
CSF3
GGTLC3
ASCC2
CALM1
CXADRP1
MBTPS1
UMOD
SPON1
NOTCH1
CXCL10
USP14
SLBP
MIR339
FXN
DEFA1
PROS1
GAD2
IGFBP3
SHBG
ATP6V1H
ARC
HIF1A
HOOK2
GHSR
HLA-A
NCAM1
CGB5
PER3
EIF2AK4
MIR21
AVP
WARS2
SLC11A2
SLC2A12
SLC5A2
TLR9
STX8
SND1
SPHKAP
RFC1
ERBB4
IL4R
CTBP1
IL23A
CDH13
GRB2
ADH1B
IL6ST
SKIL
MIR144
SIRT2
DIO2
LNPEP
MIR219A1
MIR31
PCSK1
COASY
ETFA
EP300
FGFR1
RETN
MMP13
PRKN
ATP5MC1
MIR1306
STS
ABCG2
TERF2IP
SERPINE2
KCNB1
PDGFRB
NPTXR
HLA-DRB5
PTPN4
HGF
SLC2A3
ATM
FGF23
PTPN1
SNRNP70
TLR5
ABO
XPO5
XBP1P1
MIF-AS1
CPLX1
PTGDS
PTBP1
PWAR1
DDIT3
KDM1A
SI
CHRM3
NAT10
MIR296
FOS
MIR29B2
TGFBR2
EPHX2
APPL1
TIMP1
SGMS2
NCS1
CISD2
EXOC3L2
ADRA2A
MFAP1
HDLBP
ARNTL
ATP12A
GNB3
SPHK2
CCN2
MAT1A
USE1
MARK2
ANXA5
ALPP
DHX40
IL22
MT2A
SLC2A8
GGA3
PRPF6
SH2B1
AGTR2
C5
CTNNA3
LIF
CHEK2
NPS
APOC4
CCL5
CYBB
RELA
BGN
MBOAT4
FHL5
P2RY2
CHN2
MIR409
PAX6
CEACAM5
PIWIL1
SEC14L2
NPPA
IL23R
ADIPOR1
SOCS2
MIR18A
PLA2G4A
IL15
IRS1
HSPA14
FGF21
INSRR
PPP1R3B
INPPL1
MMP8
NRF1
GGT1
PABPC4
ANGPT1
SYNE1
CXCR4
PLD1
RPL29
MIR424
MUTYH
TRPM1
SERPINF1
POR
NCF1
BCAR1
P2RX5
MIR22
UGCG
AZU1
COX1
F2R
CDK9
ANGPTL2
SLC2A4
NTS
SMAD1
CCL20
TMEM163
PADI1
PLA2G2A
WARS1
PKM
TMPRSS6
TSPAN31
CD274
TM7SF2
KCNMA1
LRP6
GAST
MANF
SGSM3
MTR
CFTR
CREBBP
SARDH
FABP5
EGR2
SOX6
CA2
FBXW7
IFNL3
MYH6
DDAH1
WNT5A
BCR
AQP9
TXNRD1
ARSA
MIR29B1
NUP62
FAM3C
ROS1
TKT
LINC-ROR
ATP5PO
FBXL7
CALCOCO2
NPEPPS
HHIP
DSPP
MSTN
PTGER3
RBP4
SELE
CISH
DRD3
CD38
BEST1
PPIG
KCNN2
PADI4
TET2
LRPPRC
ECSCR
DEFB4B
CDK4
SIRT6
SART3
PIK3C3
GDF11
ALDH1A2
ASIP
CASP7
CKB
SOCS3
PNPLA2
NRXN1
FOXP3
TCF4
CXCR6
SGK1
RUNX1
P2RX5-TAX1BP3
MAPK9
JAK2
IARS1
SERPINF2
TCP1
STMN1
TRPM7
ACAT1
LPAR2
CASZ1
MET
CXADR
SLC35A1
S100A12
SPG7
MPI
PPP2CA
ADORA1
CCL8
SLC16A1
GGTLC5P
GFER
ADA
PIK3R1
MIR30E
KRT18
IL37
GORASP1
CISD3
TNFAIP6
CD86
CCL4
G6PD
MEG3
SUGP1
BID
SPARC
STXBP3
CAMKK2
RHOA
PER1
THSD4
NFE2L1
IGF2R
SESN3
CD163
EXOC4
CXCR1
SDC2
COX10
RAB27A
BCL2L11
EBM
FLVCR1
PRKAR1A
FOXO1
GLO1
ACACA
SLC30A6
MBL3P
BRS3
CECR
CHIT1
CCL27
RAB3GAP1
POU2F3
SH2B3
MIR106B
FFAR1
ATN1
CASP12
THBS4
CYP2C9
PLTP
SEMA3A
GABRG3
FN1
HCAR2
SLC16A7
TGFB2
GSTT1
UBASH3B
ASRGL1
TERF1
LRP1B
TBX21
NPC2
SGMS1
POU2F1
BIRC3
MAP3K5
PDGFB
ROM1
PDSS2
DST
CST7
MYD88
ELMO1
TRPA1
RYR2
IGFBP5
HNF4A
NR1H3
ATF6
NR2C2
MUL1
SLC12A3
CYP2C19
ATP5PF
ENO1
SLC10A2
STAM2
GPM6A
MIR195
MAGEE1
F2RL2
EHMT2
SCARB1
MIR15B
AHR
HSD17B6
CXCR3
CCHCR1
UCP2
RARRES2
TERT
BRD2
TRPC1
CAMP
P2RX6
CRISPLD2
LGR5
OPN1MW
FKBP5
TLR3
HMBS
MYLIP
TXN2
MYH9
MGLL
CLK2
CPE
TLE1
PTGES2
MMP7
CGA
TMEM11
MIR23A
DNTT
CGB3
PDB1
CYP11A1
MIR590
GNPDA2
GREM1
CYP27A1
MAS1
IRAK1
DLD
MADD
DMD
APOA2
CYP2J2
MPST
FASN
SLC52A2
HSPB3
CD5L
LDHA
AOC3
BLM
TERF2
ERBB2
ARG1
COL17A1
NPM1
UBE2Z
HSPB8
PYY
MIR210
PCYT1A
DNASE1
DNER
CACNA1C
NR5A1
MIR192
MICA
SMAD7
CTSL
MASP1
SAA2
DEFB4A
PHF6
PLAG1
LILRB1
APOA4
IL12B
OPN1MW2
RAB11A
TOPORS
CCK
HNRNPK
ATIC
P2RY12
MSH3
DNAJC27
IL1R1
MBL2
KIDINS220
OLIG2
MTRR
MIR335
LARS1
UGT1A1
CARD8
STX1A
PEMT
THBS1
ALDH7A1
OSM
PIWIL4
ND1
VPS26A
PC
NT5C3A
GADD45GIP1
ST13
LIPG
GPR39
TNFAIP8L2
MBP
CPT1A
GGTLC4P
PRDM6
MIR127
NOX4
USP2
TP53INP1
STC1
SERPINC1
KLF2
ATHS
PRL
AHI1
GOLGA6A
NBEAL2
MIR23B
SOD3
NAMPT
SIT1
LRAT
SIRT1-AS
AOC2
IRS4
TCF7L2
UCN3
PDIA2
PDCD1
CLCN3
ST6GAL1
BCS1L
SCD5
GAL3ST1
MIR20A
OPN1MW3
SLC25A20
MUC1
MIR708
TUBB4B
VEGFC
HSPA2
MSI2
AAVS1
OPN4
PRRX1
PELI1
VWF
SSTR2
AKR1C2
ZIC1
CALR
SEPTIN1
TLE3
HARS1
DGKZ
FOXA2
NR3C2
ATP4A
PROK2
SELENBP1
HOMER1
SLC33A1
CST12P
SELENOS
TGFBI
RHO
CDKAL1
MIR15A
GHR
CCKAR
EPOR
CYP8B1
HLA-DQA1
DRD2
HYOU1
KIF11
GHS
KIF6
PPARGC1B
SLC8A1
TXNRD2
PROM1
NME1
IL7
PGP
EIF4A2
MIR151A
P2RX3
PSMD2
TERC
WAC
MIR221
CTCF
FGF14
CFD
CCRL2
MTNR1B
ABCC8
ZNF410
PMM2
HAS3
PSMD3
FAF1
STK11
FOLR1
PSAT1
RAMP2
LEPR
SLC47A1

## Sheet: AD & T2DM & cognition genes
GLB1
UCHL1
NECTIN2
LDLR
IL13
LPL
FLNA
HMOX1
DNM1L
SIGLEC7
ALDH2
MTHFR
COX8A
CD33
TSHZ1
IL18
NRXN3
TNFRSF1B
CAMK2A
GTF2H1
UTRN
CRP
FZD4
ABCB1
P2RX4
AIF1
TNFSF10
POTEM
HSPA4
POTEKP
ABCG1
SERPINA3
MEF2C
PDIK1L
KHSRP
BCL2A1
NEFL
CBSL
SOD2
ANPEP
TTR
IFNA13
NR1H2
CYP46A1
IL6R
NANS
KLK3
ANGPT2
NPC1
YY1
MOK
SCD
CST3
GDF2
CRMP1
HSPB2
P4HB
NOG
PTPN11
GDNF
DCTN4
ATXN2
CETP
MMP9
SOAT1
CFH
NFATC2
MAOA
LAMP2
SEMA6A
SERPINE1
DBH
CYP19A1
MIR200B
APOB
VIP
HP
C3
VPS51
ACTBL2
ENO2
CALCA
IL33
ALB
CD14
F3
BMP4
CD36
RENBP
GPI
NOL3
EPHA4
IGF1R
CDKN2A
ABCB6
ELK3
MTNR1A
ANKK1
CBS
APOC3
ATG5
P2RY1
AR
VLDLR
ACOT7
BMI1
FTO
CEBPB
IRS2
LRP1
DENR
BACE2
CDC42
MIR181C
VCAM1
PCSK9
GRK2
LINC01672
TTN
ICAM1
FGF2
SST
SYT1
ACTG2
IFNA1
RBM45
KHDRBS1
WNK1
C20orf181
PAK1
CTRL
LRP2
VDR
REG1A
HLA-DRB1
GLS
FABP3
HSPA5
CAD
ADM
GPBAR1
FLT1
ACTG1
CALCR
CYP2D6
SLC2A1
FAT1
P2RX1
SLC18A2
LMNA
VSNL1
P2RX7
HTR2C
ATRNL1
ATP7A
MMP2
FOLH1B
ADAMTS13
PLA2G7
USF1
EGF
HFE
ACE2
ANXA1
IKBKB
GAS6
COL3A1
PLA2G1B
PGR-AS1
KDR
GRK5
PLXNA2
RXRA
MEF2A
P2RX2
DAPK2
GDF15
SRR
MIR26B
TPM1
S100A8
CALM1
SPON1
NOTCH1
CXCL10
FXN
GAD2
IGFBP3
PER3
MIR21
SLC5A2
RFC1
MIR144
SIRT2
EP300
FGFR1
MMP13
ABCG2
KCNB1
HGF
SLC2A3
ATM
FGF23
ABO
MIF-AS1
PTBP1
CHRM3
NCS1
ADRA2A
SH2B1
AGTR2
C5
RELA
FHL5
P2RY2
MIR18A
FGF21
ANGPT1
MUTYH
TRPM1
SERPINF1
POR
P2RX5
ANGPTL2
SLC2A4
NTS
TSPAN31
CD274
TM7SF2
KCNMA1
MTR
FABP5
WNT5A
NUP62
ROS1
CALCOCO2
DSPP
MSTN
PTGER3
RBP4
SELE
CISH
DRD3
TET2
GDF11
NRXN1
TCF4
P2RX5-TAX1BP3
JAK2
TRPM7
ACAT1
MET
CXADR
S100A12
ADORA1
SLC16A1
GORASP1
CCL4
MEG3
STXBP3
PER1
RAB27A
PRKAR1A
FOXO1
CECR
POU2F3
NPC2
MAP3K5
IGFBP5
ATF6
CYP2C19
EHMT2
CAMP
P2RX6
OPN1MW
CYP27A1
DMD
COL17A1
MIR210
MIR192
OPN1MW2
OLIG2
THBS1
ALDH7A1
LIPG
TNFAIP8L2
MBP
NOX4
USP2
AHI1
NBEAL2
MIR23B
NAMPT
CLCN3
ST6GAL1
MIR20A
OPN1MW3
CALR
HARS1
SLC33A1
GHR
EPOR
TXNRD2
PROM1
P2RX3
CCRL2
ABCC8
FOLR1

## Sheet: AD & T2DM & memory genes
MAPT
PSEN1
APP
ACHE
IL1B
DRD2
BCL2
COMT
SLC6A4
AVP
IGF2
KL
STAT3
SIGMAR1
NPY
VEGFA
MIF
PRKN
SPHK2
INS
LNPEP
IL10
GRN
TLR4
COX2
PIK3CA
CP
MYD88
XPR1
DNMT1
FAS
PRRT2
ATN1
FGF14
UGT1A1
HLA-DQB1
PDGFB
TREM2
ND1
PDGFRB
COX3
COX1
IL12A
MSH2
MME
MEFV
ARSA
APOE
ND4
TRNL1
BACE1
SPG7
SORL1
ATXN1
BDNF
TGFBR2
TNF
STUB1
SQSTM1
TOMM40
CASP3
TYROBP
C4A
IL23R
NFE2L2
GSK3B
ESR1
CNR1
IL6
HCRT
SUCLA2
CREB1
CAT
SNCA
CHRNA4
DYRK1A
MAPK1
ST3GAL4
RAC1
PVALB
GABPA
MAPK3
NGF
MAPK8
CDK5
GFAP
PTEN
PTGS2
EHMT1
EPHB2
EPO
ITM2B
PPARG
LEP
CAV1
CASP1
MCIDAS
PTPA
AKT1
GPX1
CTNNB1
SIRT1
ADRA2B
SOD1
CNR2
RELN
GCG
HMGB1
PRKAA2
APLN
PRKAA1
HDAC3
IGF1
GRAP2
PDE5A
BRCA2
PIK3CG
PIK3CD
PIK3CB
PRKAB1
NGFR
S100B
ACKR3
TRPV1
PTPN5
LAMC2
POMC
AIMP2
TH
S100A9
AHSA1
AGT
NR3C1
ESR2
FANCD2
PTK2B
SMUG1
ALOX5
GAD1
RNF19A
PPARGC1A
MTCO2P12
CRK
FNDC5
CSF2
MAPK14
POLDIP2
KMT2A
CRTC1
SERPING1
TLR2
CYBB
NFKB1
TAC1
NR3C2
LCN2
CXCR6
MIR132
OGA
CPLX1
SSTR4
ADRA1A
NTRK2
CCL11
ABCA1
AGTR1
CREBBP
CRHR1
PRKCA
EDNRA
PLD1
NR4A2
BRS3
NLRP3
SMPD1
BCHE
CLU
ACTB
PRKCD
ZGLP1
LPAR2
HDAC4
HTR2A
IDE
IL1A
GPR42
HTR4
GLP1R
CDK9
GLUL
HSD11B1
BIN1
MSC
CARTPT
APOA1
IFNG
CCL2
SLCO6A1
HOMER1
CX3CL1
CCL3
EIF2AK3
SNAP25
NCF1
CNTF
PINK1
SLC1A2
NTN1
ADCYAP1
RARRES2
PARP1
PTPN1
PTPN4
PTPRC
CSF3
NPS
RPS6KB1
RYR2
SORT1
CPT1A
CPE
RHO
HDAC9
REN
CD44
SHBG
CLOCK
CACNA1C
LILRB1
ADA
CCR2
TXN
COASY
BECN1
TXNIP
PLA2G6
CAPN1
CAPN2
PICALM
MBTPS1
ADIPOQ
SLC16A7
STX1A
SPP1
BRCA1
LIN28A
TERT
TFAM
TNFRSF1A
TP53
TRPC1
TRPM2
TGFB1
KALRN
SELENBP1
TLE1
CHI3L1
KIDINS220
KNG1
MIR155
MIR206
MIR223
MIR23A
MIR27A
MIR29C
MIR34A
MIR34C
GH1
SMAD2
MIR146A
MIR142
DISC1
GJA1
LGALS3
GIP
MIR106B
MIR107
STS
EIF2AK4
MIR335
MTOR
ALOX15
RNR2
TRAM1
MOG
MPO
FOLH1
HNF4A
TBK1
PYCARD
IAPP
GOLGA6A
NRG1
HIF1A
GSTT1
GSTM1
FLVCR1
REM1
ILK
INPPL1
INSR
IRAK1
IRS1
ITGAM
ITGB2
GSTK1
IL17A
IGFALS
GPT
IL1RN
IL4
CXCL8
FFAR1
PIK3R1
PPARD
RCBTB1
DPP4
AGER
RCAN1
PPARA
PKM
PLA2G4A
PLAT
PLEK
AHR
EGR1
EDN1
CCHCR1
VPS35
PRKCB
CX3CR1
CUX1
CCN2
CTF1
CYP1A2
CFD
DECR1
DCX
EIF2AK2
ACE
PROS1
SIRT3
NOS3
FKBP5
NPPA
NTRK1
NOS2
NOS1
ARC
FOXM1
DKK1
OPRM1
PAEP
NLGN1
PCSK1
PDE4D
AKT2
ERBB4
PAX6
GAL
ADIPOR1
